# Supplementary material for: Polymer-assisted preparation of nanoscale films of thermoelectric PbSe and PbTe and of lead chalcogenide-polymer composite films
Source: Royal Society of Chemistry journal article supplement (doi:10.1039/c0dt00745e), 2010-01-01
Supplement: c0dt00745e.pdf [file c0dt00745e.pdf]

## Supporting Information

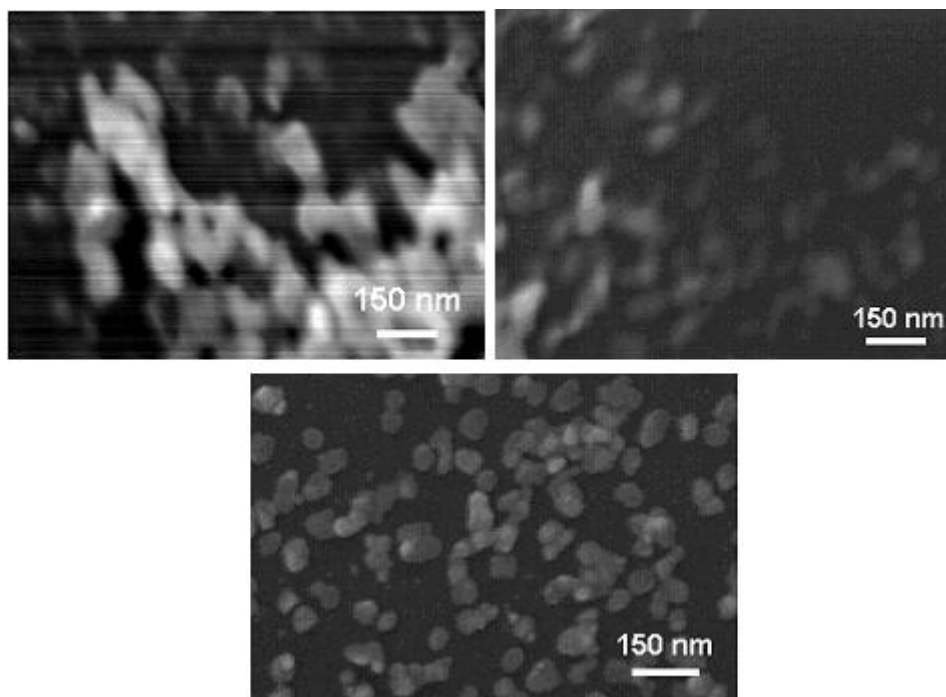

**Figure S1.** Film of PbSe particles obtained from a polymer/precursor mixture with a 1:1 ratio. The reaction conditions were 20 min at 450 °C (top, left), 30 min at 425 °C (top, right) and 20 min at 425 °C (bottom).

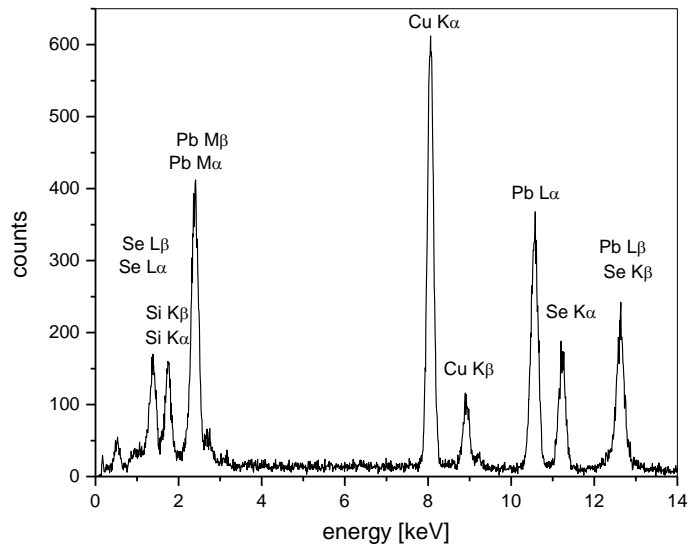

**Figure S2.** TEM EDX spectrum of the lead selenide particles.

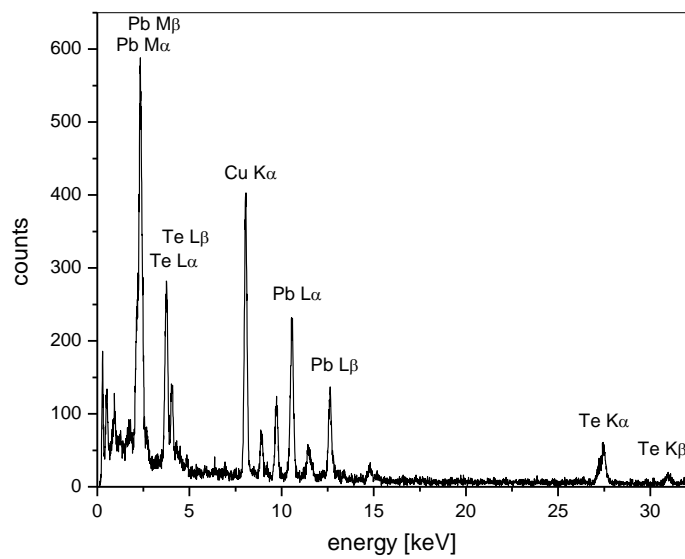

**Figure S3.** TEM EDX spectrum of the lead telluride particles.
